# Supplementary material for: Linking Circulating Serum Proteins with Clinical Outcomes in Esophageal Adenocarcinoma—An Emerging Role for Chemokines
Source: MDPI journal article supplement (doi:10.3390/cancers12113356), 2020-11-13
Supplement: s1 [file s1]

# Linking Circulating Serum Proteins with Clinical Outcomes in Esophageal Adenocarcinoma—An Emerging Role for Chemokines

Noel E Donlon, Andrew Sheppard, Maria Davern, Fiona O'Connell, James J Phelan, Robert Power, Timothy Nugent, Kate Dinneen, John Aird, John Greene, Paul Nevins Selvadurai, Anshul Bhardwaj, Emma K Foley, Narayanasamy Ravi, Claire L Donohoe, John V Reynolds, Joanne Lysaght, Jacintha O'Sullivan and Margaret R Dunne

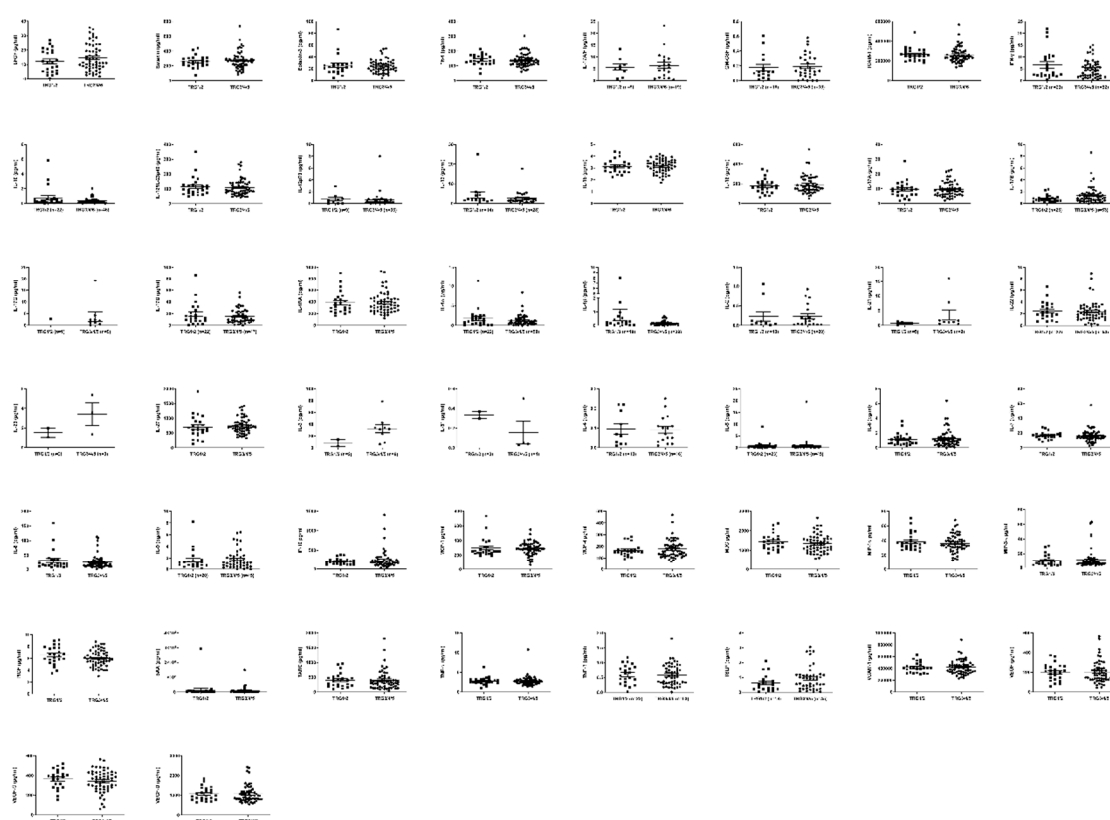

**Figure S1.** No difference in levels of serum proteins was observed between low and high TRG groups.

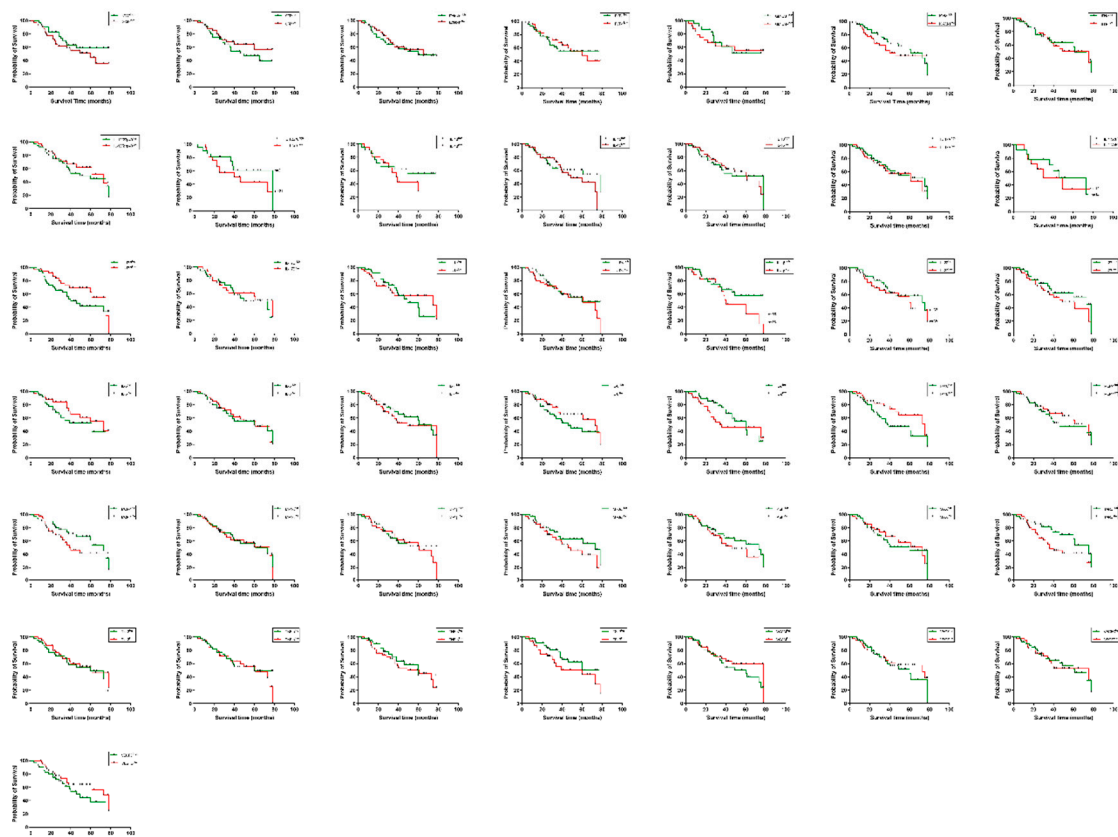

**Figure S2.** Serum proteins were not significantly associated with OS time.

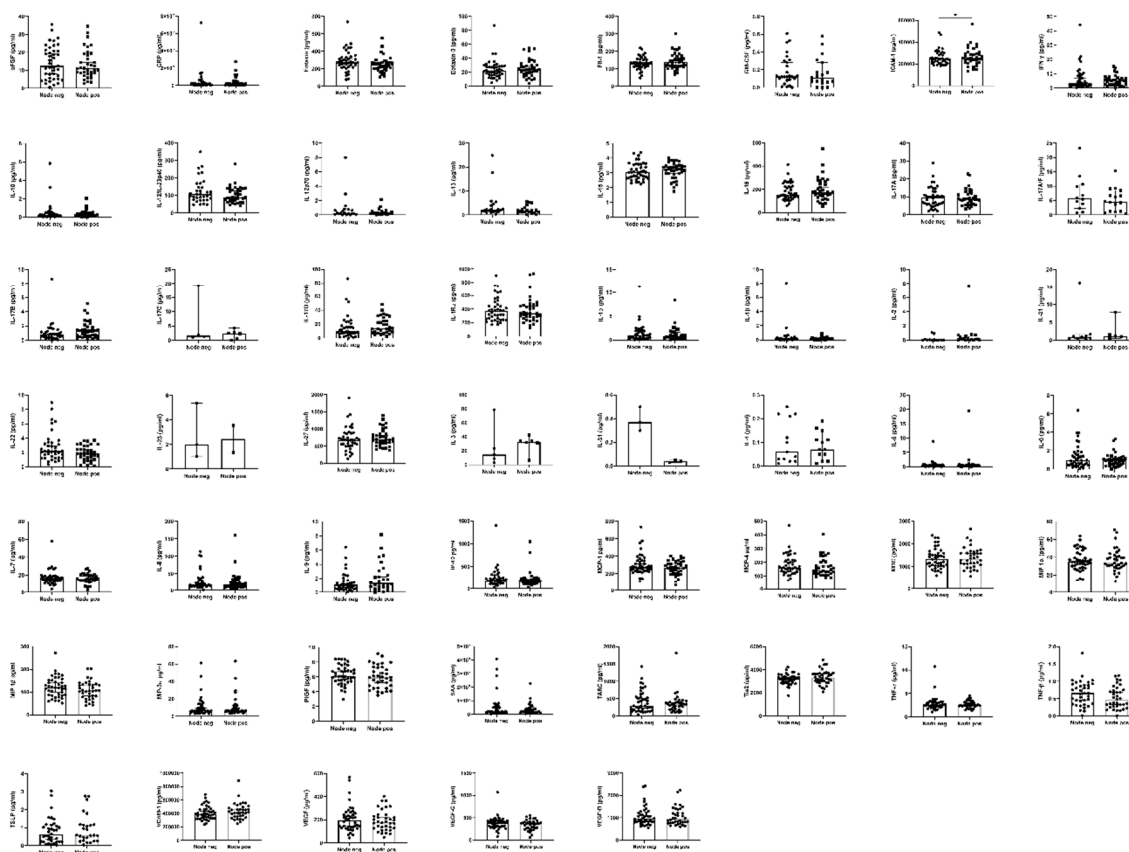

**Figure S3.** Serum protein levels were not altered between node negative and node positive groups.

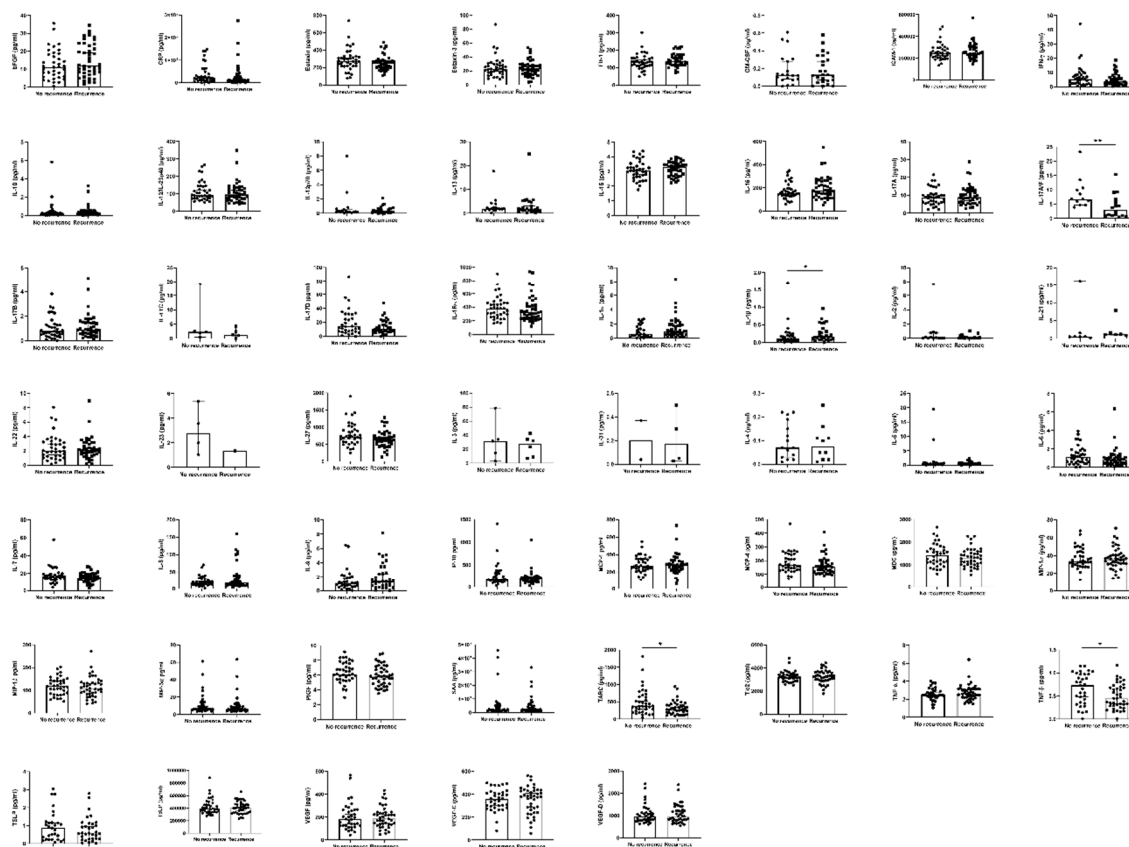

**Figure S4.** Serum protein levels were not altered between recurrence and no recurrence groups.

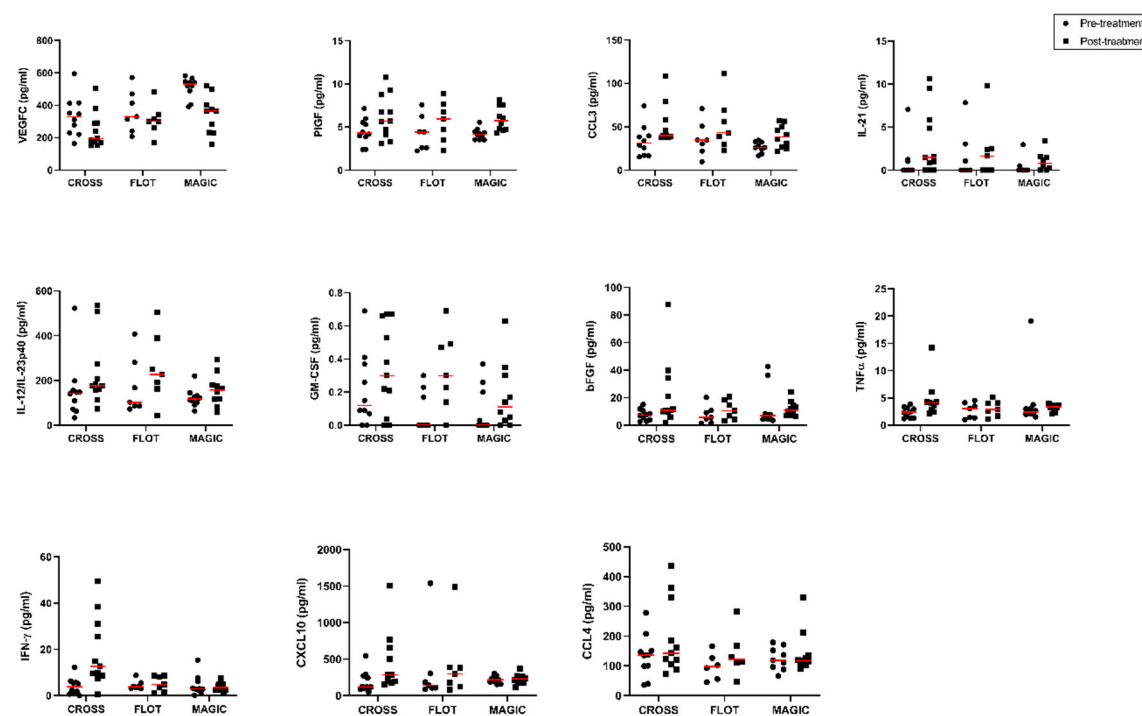

**Figure S5.** Levels of serum marker expression before and after neo-CT treatments.

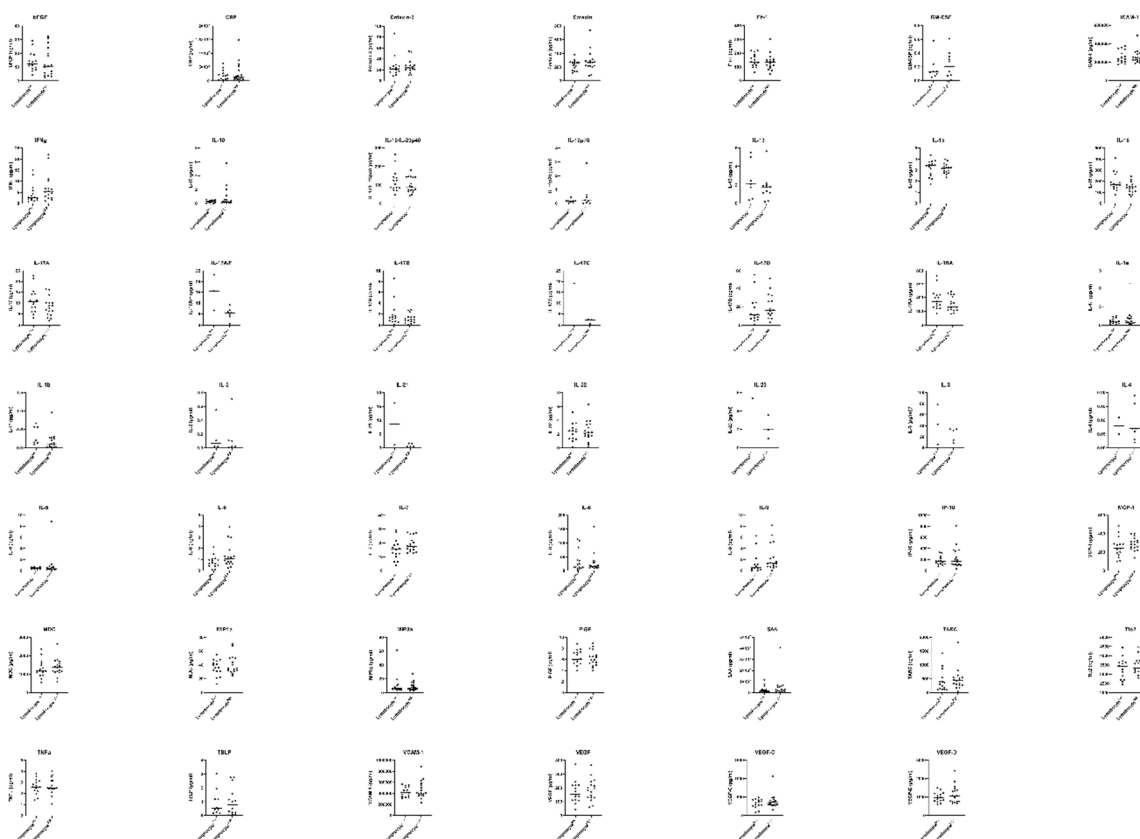

**Figure S6.** Serum protein levels were not altered between lymphocyte high, and low tumor groups.
